# Supplementary material
Source: PubMed Central journal article supplement (PMC2818526)
Supplement: NIHMS160358-supplement-01.pdf [file NIHMS160358-supplement-01.pdf]

GenBank accession number, host and geographical origin  
of 135 *Enterocytozoon bieneusi* ITS sequences

|          |         |          |
|----------|---------|----------|
| AB359945 | bovine  | Japan    |
| AB359946 | dog     | Japan    |
| AB359947 | dog     | Japan    |
| AB470279 | pig     | Japan    |
| AB470280 | pig     | Japan    |
| AB470281 | pig     | Japan    |
| AB470282 | pig     | Japan    |
| AB470283 | pig     | Japan    |
| AB470284 | pig     | Japan    |
| AF135832 | pig     | Germany  |
| AF135833 | pig     | Germany  |
| AF135834 | pig     | Germany  |
| AF135835 | pig     | Germany  |
| AF135836 | bovine  | Germany  |
| AF135837 | bovine  | Germany  |
| AF242475 | human   | France   |
| AF242476 | human   | France   |
| AF242477 | human   | France   |
| AF242478 | human   | France   |
| AF242479 | human   | France   |
| AF502396 | human   | Uganda   |
| AY237209 | raccoon | Maryland |
| AY237210 | raccoon | Maryland |
| AY237211 | raccoon | Maryland |
| AY237212 | muskrat | Maryland |
| AY237213 | muskrat | Maryland |
| AY237214 | muskrat | Maryland |
| AY237215 | beaver  | Maryland |
| AY237216 | fox     | Maryland |
| AY237217 | beaver  | Maryland |
| AY237218 | muskrat | Maryland |
| AY237219 | fox     | Maryland |
| AY237220 | beaver  | Maryland |
| AY237221 | muskrat | Maryland |
| AY237222 | muskrat | Maryland |
| AY237223 | raccoon | Maryland |
| AY237224 | muskrat | Maryland |
| AY237225 | raccoon | Maryland |
| AY357185 | human   | Thailand |
| AY357186 | human   | Thailand |
| AY357187 | human   | Thailand |
| AY357188 | human   | Thailand |
| AY357189 | human   | Thailand |
| AY357190 | human   | Thailand |
| AY357191 | human   | Thailand |

|          |        |          |
|----------|--------|----------|
| AY357192 | human  | Thailand |
| AY357193 | human  | Thailand |
| AY357194 | human  | Thailand |
| AY357195 | human  | Thailand |
| AY357196 | human  | Thailand |
| AY357197 | human  | Thailand |
| AY357198 | human  | Thailand |
| AY357199 | human  | Thailand |
| AY357200 | human  | Thailand |
| AY357201 | human  | Thailand |
| AY357202 | human  | Thailand |
| AY357203 | human  | Thailand |
| AY357204 | human  | Thailand |
| AY371276 | human  | Peru     |
| AY371277 | human  | Peru     |
| AY371278 | human  | Peru     |
| AY371279 | human  | Peru     |
| AY371280 | human  | Peru     |
| AY371281 | human  | Peru     |
| AY371282 | human  | Peru     |
| AY371283 | human  | Peru     |
| AY371284 | human  | Peru     |
| AY371285 | human  | Peru     |
| AY371286 | human  | Peru     |
| DQ154136 | bovine | E_USA    |
| DQ154137 | bovine | E_USA    |
| DQ425107 | bird   | Portugal |
| DQ425108 | bird   | Portugal |
| DQ683746 | human  | Gabon    |
| DQ683747 | human  | Gabon    |
| DQ683748 | human  | Gabon    |
| DQ683749 | human  | Gabon    |
| DQ683750 | human  | Gabon    |
| DQ683751 | human  | Gabon    |
| DQ683752 | human  | Gabon    |
| DQ683753 | human  | Cameroon |
| DQ683754 | human  | Cameroon |
| DQ683755 | human  | Cameroon |
| DQ683756 | human  | Cameroon |
| DQ683757 | human  | Cameroon |
| DQ793213 | falcon | UAE      |
| DQ836342 | cat    | Colombia |
| DQ836343 | cat    | Colombia |
| DQ836344 | cat    | Colombia |
| DQ836345 | cat    | Colombia |
| DQ885579 | cat    | Portugal |
| DQ885580 | cat    | Portugal |
| DQ885581 | kudo   | Portugal |
| DQ885582 | dog    | Portugal |

|          |          |           |
|----------|----------|-----------|
| DQ885583 | dog      | Portugal  |
| DQ885584 | cat      | Portugal  |
| DQ885585 | dog      | Portugal  |
| DQ885586 | bovine   | Portugal  |
| DQ885587 | bovine   | Portugal  |
| DQ885588 | marmoset | Portugal  |
| EF014427 | human    | Peru      |
| EF014428 | human    | Peru      |
| EF014429 | human    | Peru      |
| EF014430 | human    | Peru      |
| EF014431 | human    | Peru      |
| EF139194 | bovine   | Korea     |
| EF139195 | bovine   | Korea     |
| EF139196 | bovine   | Korea     |
| EF139197 | bovine   | Korea     |
| EF139198 | bovine   | Korea     |
| EF139199 | bovine   | Korea     |
| EF458627 | human    | Vietnam   |
| EF458628 | human    | Niger     |
| EU140500 | human    | Peru      |
| EU153584 | bovine   | E_USA     |
| EU153585 | bovine   | E_USA     |
| EU650271 | dog      | Colombia  |
| EU650272 | dog      | Colombia  |
| EU650273 | dog      | Colombia  |
| EU849129 | pig      | Germany   |
| EU849130 | pig      | Germany   |
| EU883783 | pig      | Germany   |
| FJ174697 | human    | Australia |
| FJ439677 | human    | Malawi    |
| FJ439678 | human    | Malawi    |
| FJ439679 | human    | Malawi    |
| FJ439680 | human    | Malawi    |
| FJ439681 | human    | Malawi    |
| FJ439682 | human    | Malawi    |
| FJ439683 | human    | Holland   |
| FJ439684 | human    | Holland   |
| FJ439685 | human    | Holland   |
| FJ469914 | human    | Congo     |
| FJ469915 | bovine   | Cameroon  |
| FJ469916 | pig      | Cameroon  |
